# Supplementary material
Source: PubMed Central journal article supplement (PMC3502916)
Supplement: AEM.02432-12_zam999103941so1.pdf [file AEM.02432-12_zam999103941so1.pdf]

**Table S1.** Summary of the Chesapeake and Delaware Bay samples that were sequenced after gp23 PCR and RAPD-PCR. **Abbreviations: +, Positive amplification; ND, not determined; F, failed to amplify; NS, Not sequenced**

| Cruise Date | Station | PFGE band | Genome size (Kb) | gp23 PCR | RAPD-PCR | Sequence name           | Clone number | Geographic location | Latitude | Longitude | Temperature | Salinity |
|-------------|---------|-----------|------------------|----------|----------|-------------------------|--------------|---------------------|----------|-----------|-------------|----------|
| Mar-06      | CB707   | 1         | 63.5             | +        | ND       | Mar06_CB707_1_3A        | 3A           | Chesapeake Bay      | 37.11717 | -76.1183  | 10.103      | 23.4152  |
| Mar-06      | CB707   | 1         | 63.5             | +        | -        | Mar06_CB707_1_3B        | 3B           | Chesapeake Bay      |          |           |             |          |
| Mar-06      | CB707   | 1         | 63.5             | +        | -        | Mar06_CB707_1_3C        | 3C           | Chesapeake Bay      |          |           |             |          |
| Mar-06      | CB707   | 1         | 63.5             | +        | -        | Mar06_CB707_1_3D        | 3D           | Chesapeake Bay      |          |           |             |          |
| Mar-06      | CB707   | 1         | 63.5             | +        | -        | Mar06_CB707_1_3E        | 3E           | Chesapeake Bay      |          |           |             |          |
| Mar-06      | CB858   | 2         | 33.5             | +        | ND       | Mar06_CB858_2_9A        | 9A           | Chesapeake Bay      | 38.96183 | -76.3855  | 8.4693      | 10.4169  |
| Mar-06      | CB858   | 2         | 33.5             | +        | -        | Mar06_CB858_2_9B        | 9B           | Chesapeake Bay      |          |           |             |          |
| Mar-06      | CB858   | 2         | 33.5             | +        | -        | Mar06_CB858_2_9C        | 9C           | Chesapeake Bay      |          |           |             |          |
| Mar-06      | CB858   | 2         | 33.5             | +        | -        | Mar06_CB858_2_9D        | 9D           | Chesapeake Bay      |          |           |             |          |
| Mar-06      | CB858   | 2         | 33.5             | +        | -        | Mar06_CB858_2_9E        | 9E           | Chesapeake Bay      |          |           |             |          |
| Jun-06      | CB707   | 1         | 242              | +        | +        | June06_CB707_1_1A,2B    | 1A, 2B       | Chesapeake Bay      | 37.07    | -76.06    | 21.7        | 23.3     |
| Jun-06      | CB707   | 1         | 242              | +        | -        | June06_CB707_1_1B       | 1B           | Chesapeake Bay      |          |           |             |          |
| Jun-06      | CB707   | 1         | 242              | +        | -        | June06_CB707_1_1C       | 1C           | Chesapeake Bay      |          |           |             |          |
| Jun-06      | CB707   | 1         | 242              | +        | -        | June06_CB707_1_2A,3A    | 2A, 3A       | Chesapeake Bay      |          |           |             |          |
| Jun-06      | CB707   | 1         | 242              | +        | -        | June06_CB707_1_2C       | 2C           | Chesapeake Bay      |          |           |             |          |
| Jun-06      | CB707   | 1         | 242              | +        | -        | June06_CB707_1_2E       | 2E           | Chesapeake Bay      |          |           |             |          |
| Jun-06      | CB707   | 1         | 242              | +        | -        | June06_CB707_1_3B,3D,2D | 3B,3D,2D     | Chesapeake Bay      |          |           |             |          |
| Jun-06      | CB707   | 1         | 242              | +        | -        | June06_CB707_1_3C       | 3C           | Chesapeake Bay      |          |           |             |          |
| Jun-06      | CB707   | 1         | 242              | +        | -        | June06_CB707_1_3E       | 3E           | Chesapeake Bay      |          |           |             |          |
| Jun-06      | CB707   | 2         | 242              | +        | +        | June06_CB707_2_4A       | 4A           | Chesapeake Bay      |          |           |             |          |
| Jun-06      | CB707   | 2         | 242              | +        | -        | June06_CB707_2_4B       | 4B           | Chesapeake Bay      |          |           |             |          |
| Jun-06      | CB707   | 2         | 242              | +        | -        | June06_CB707_2_4C,4D    | 4C, 4D       | Chesapeake Bay      |          |           |             |          |
| Jun-06      | CB707   | 2         | 242              | +        | -        | June06_CB707_2_4E       | 4E           | Chesapeake Bay      |          |           |             |          |
| Jun-06      | CB707   | 2         | 242              | +        | -        | June06_CB707_2_13A      | 13A          | Chesapeake Bay      |          |           |             |          |
| Jun-06      | CB707   | 4         | 63.5             | +        | +        | June06_CB707_4_14A      | 14A          | Chesapeake Bay      |          |           |             |          |
| Jun-06      | CB707   | 5         | 48.5             | +        | +        | June06_CB707_5_16A      | 16A          | Chesapeake Bay      |          |           |             |          |
| Jun-06      | CB858   | 7         | 242              | +        | +        | June06_CB858_7_19A,19B  | 19A, 19B     | Chesapeake Bay      | 38.96    | -76.38    | 20.5        | 10.6     |
| Jun-06      | CB858   | 8         | 242              | +        | +        | June06_CB858_8_21A,21B  | 21A, 21B     | Chesapeake Bay      |          |           |             |          |

| Cruise Date | Station | PFGE band | Genome size (Kb) | gp23 PCR | RAPD-PCR | Sequence name               | Clone number  | Geographic location | Latitude | Longitude | Temperature | Salinity |
|-------------|---------|-----------|------------------|----------|----------|-----------------------------|---------------|---------------------|----------|-----------|-------------|----------|
| Jun-06      | CB858   | 9         | 242              | +        | +        | June06_CB858_9_23A,23B      | 23A, 23B      | Chesapeake Bay      |          |           |             |          |
| Jun-06      | CB858   | 9         | 242              | +        | -        | June06_CB858_9_23C          | 23C           | Chesapeake Bay      |          |           |             |          |
| Jun-06      | CB858   | 10        | 194              | +        | +        | June06_CB858_10_25A,25B     | 25A, 25B      | Chesapeake Bay      |          |           |             |          |
| Jun-06      | CB858   | 10        | 194              | +        | -        | June06_CB858_10_25C         | 25C           | Chesapeake Bay      |          |           |             |          |
| Jun-06      | CB858   | 11        | 63.5             | +        | +        | June06_CB858_11_28A,28B,29C | 28A, 28B, 29C | Chesapeake Bay      |          |           |             |          |
| Jun-06      | CB858   | 13        | 48.5             | +        | +        | June06_CB858_13_33A,33B     | 33A,33B       | Chesapeake Bay      |          |           |             |          |
| Jun-06      | DB21    | 14        | 48.5             | +        | +        | June06_DB21_14_34A          | 34A           | Delaware Bay        | 39.17    | -75.22    | 21.3        | 16.2     |
| Jun-06      | DB21    | 14        | 48.5             | +        | +        | June06_DB21_14_34B,34C      | 34B, 34C      | Delaware Bay        |          |           |             |          |
| Jun-06      | DB21    | 15        | 33.5             | +        | +        | June06_DB21_15_35A          | 35A           | Delaware Bay        |          |           |             |          |
| Jul-06      | CB858   | 1         | 242              | +        | ND       | July06_CB858_1_6A           | 6A            | Chesapeake Bay      | 38.58    | -76.23    | 26.85       | 6.3      |
| Jul-06      | CB858   | 1         | 242              | +        | -        | July06_CB858_1_6B           | 6B            | Chesapeake Bay      |          |           |             |          |
| Jul-06      | CB858   | 1         | 242              | +        | -        | July06_CB858_1_6C           | 6C            | Chesapeake Bay      |          |           |             |          |
| Jul-06      | CB858   | 1         | 242              | +        | -        | July06_CB858_1_6D           | 6D            | Chesapeake Bay      |          |           |             |          |
| Jul-06      | CB858   | 2         | 33.5             | +        | +        | July06_CB858_2_1A           | 1A            | Chesapeake Bay      |          |           |             |          |
| Jul-06      | CB858   | 2         | 33.5             | +        | -        | July06_CB858_2_1B           | 1B            | Chesapeake Bay      |          |           |             |          |
| Jul-06      | CB858   | 2         | 33.5             | +        | -        | July06_CB858_2_1C           | 1C            | Chesapeake Bay      |          |           |             |          |
| Jul-06      | CB858   | 2         | 33.5             | +        | -        | July06_CB858_2_1D           | 1D            | Chesapeake Bay      |          |           |             |          |
| Jul-06      | CB804   | 3         | 194              | +        | +        | July06_CB804_3_8A           | 8A            | Chesapeake Bay      | 38.04    | -76.13    | 28          | 11.6     |
| Jul-06      | CB804   | 3         | 194              | +        | -        | July06_CB804_3_8C           | 8C            | Chesapeake Bay      |          |           |             |          |
| Jul-06      | CB804   | 3         | 194              | +        | -        | July06_CB804_3_8D           | 8D            | Chesapeake Bay      |          |           |             |          |
| Jul-06      | CB804   | 3         | 194              | +        | -        | July06_CB804_3_8E           | 8E            | Chesapeake Bay      |          |           |             |          |
| Jul-06      | CB804   | 4         | 112              | +        | ND       | July06_CB804_4_10A          | 10A           | Chesapeake Bay      |          |           |             |          |
| Jul-06      | CB804   | 4         | 112              | +        | -        | July06_CB804_4_10B          | 10B           | Chesapeake Bay      |          |           |             |          |
| Jul-06      | CB804   | 4         | 112              | +        | -        | July06_CB804_4_10C          | 10C           | Chesapeake Bay      |          |           |             |          |
| Jul-06      | CB804   | 4         | 112              | +        | -        | July06_CB804_4_10D          | 10D           | Chesapeake Bay      |          |           |             |          |
| Jul-06      | CB804   | 4         | 112              | +        | -        | July06_CB804_4_10E          | 10E           | Chesapeake Bay      |          |           |             |          |
| Jul-06      | CB707   | 5         | 242              | +        | ND       | July06_CB707_5_5A           | 5A            | Chesapeake Bay      | 37.07    | -76.07    | 25.5        | 24.7     |

| Cruise Date | Station | PFGE band | Genome size (Kb) | gp23 PCR | RAPD-PCR | Sequence name     | Clone number | Geographic location | Latitude | Longitude | Temperature | Salinity |
|-------------|---------|-----------|------------------|----------|----------|-------------------|--------------|---------------------|----------|-----------|-------------|----------|
| Jul-06      | CB707   | 5         | 242              | +        | -        | July06_CB707_5_5B | 5B           | Chesapeake Bay      |          |           |             |          |
| Jul-06      | CB707   | 5         | 242              | +        | -        | July06_CB707_5_5C | 5C           | Chesapeake Bay      |          |           |             |          |
| Jul-06      | CB707   | 5         | 242              | +        | -        | July06_CB707_5_5D | 5D           | Chesapeake Bay      |          |           |             |          |
| Jul-06      | CB707   | 6         | 63.5             | +        | +        | July06_CB707_6_4A | 4A           | Chesapeake Bay      |          |           |             |          |
| Jul-06      | CB707   | 6         | 63.5             | +        | -        | July06_CB707_6_4D | 4D           | Chesapeake Bay      |          |           |             |          |
| Jul-06      | CB707   | 6         | 63.5             | +        | -        | July06_CB707_6_4E | 4E           | Chesapeake Bay      |          |           |             |          |
| Jul-06      | CB858   | 7         | 63.5             | +        | +        | NS                |              | Chesapeake Bay      |          |           |             |          |
| Jul-06      | CB804   | 8         | 63.5             | +        | +        | NS                |              | Chesapeake Bay      |          |           |             |          |
| Jul-06      | CB804   | 9         | 242              | +        | +        | NS                |              | Chesapeake Bay      |          |           |             |          |
| Nov-06      | CB804   | 1         | 194              | +        | +        | Nov06_CB804_1_7A  | 7A           | Chesapeake Bay      | 38.04    | -76.13    | 13.75       | 16.5     |
| Nov-06      | CB804   | 1         | 194              | +        | -        | Nov06_CB804_1_7C  | 7C           | Chesapeake Bay      |          |           |             |          |
| Nov-06      | CB804   | 1         | 194              | +        | -        | Nov06_CB804_1_7D  | 7D           | Chesapeake Bay      |          |           |             |          |
| Nov-06      | CB804   | 1         | 194              | +        | -        | Nov06_CB804_1_7E  | 7E           | Chesapeake Bay      |          |           |             |          |
| Nov-06      | CB804   | 2         | 112              | +        | ND       | Nov06_CB804_2_2A  | 2A           | Chesapeake Bay      |          |           |             |          |
| Nov-06      | CB804   | 2         | 112              | +        | -        | Nov06_CB804_2_2B  | 2B           | Chesapeake Bay      |          |           |             |          |
| Nov-06      | CB804   | 2         | 112              | +        | -        | Nov06_CB804_2_2C  | 2C           | Chesapeake Bay      |          |           |             |          |
| Nov-06      | CB804   | 2         | 112              | +        | -        | Nov06_CB804_2_2D  | 2D           | Chesapeake Bay      |          |           |             |          |
| Nov-06      | CB804   | 2         | 112              | +        | -        | Nov06_CB804_2_2E  | 2E           | Chesapeake Bay      |          |           |             |          |
| Nov-06      | CB858   | 3         | 33.5             | F        | +        | -                 |              | Chesapeake Bay      |          |           |             |          |
| Nov-06      | CB858   | 4         | 63.5             | F        | +        | -                 |              | Chesapeake Bay      |          |           |             |          |
| Nov-06      | CB804   | 5         | 63.5             | F        | +        | -                 |              | Chesapeake Bay      |          |           |             |          |
| Nov-06      | CB707   | 6         | 63.5             | F        | +        | -                 |              | Chesapeake Bay      |          |           |             |          |
| Nov-06      | CB804   | 7         | 242              | +        | +        | NS                |              | Chesapeake Bay      |          |           |             |          |
| Feb-07      | CB858   | 1         | <b>33.5</b>      | F        | +        | -                 |              | Chesapeake Bay      |          |           |             |          |
| Feb-07      | CB858   | 2         | 63.5             | F        | +        | -                 |              | Chesapeake Bay      |          |           |             |          |
| Feb-07      | CB804   | 3         | 63.5             | F        | +        | -                 |              | Chesapeake Bay      |          |           |             |          |
| Feb-07      | CB707   | 4         | 63.5             | F        | +        | -                 |              | Chesapeake Bay      |          |           |             |          |
| Jul-07      | CB858   | 1         | 33.5             | F        | +        | -                 |              | Chesapeake Bay      |          |           |             |          |
| Jul-07      | CB858   | 2         | 63.5             | F        | +        | -                 |              | Chesapeake Bay      |          |           |             |          |
