# Supplementary material
Source: PubMed Central journal article supplement (PMC3502916)
Supplement: AEM.02432-12_zam999103941so2.pdf [file AEM.02432-12_zam999103941so2.pdf]

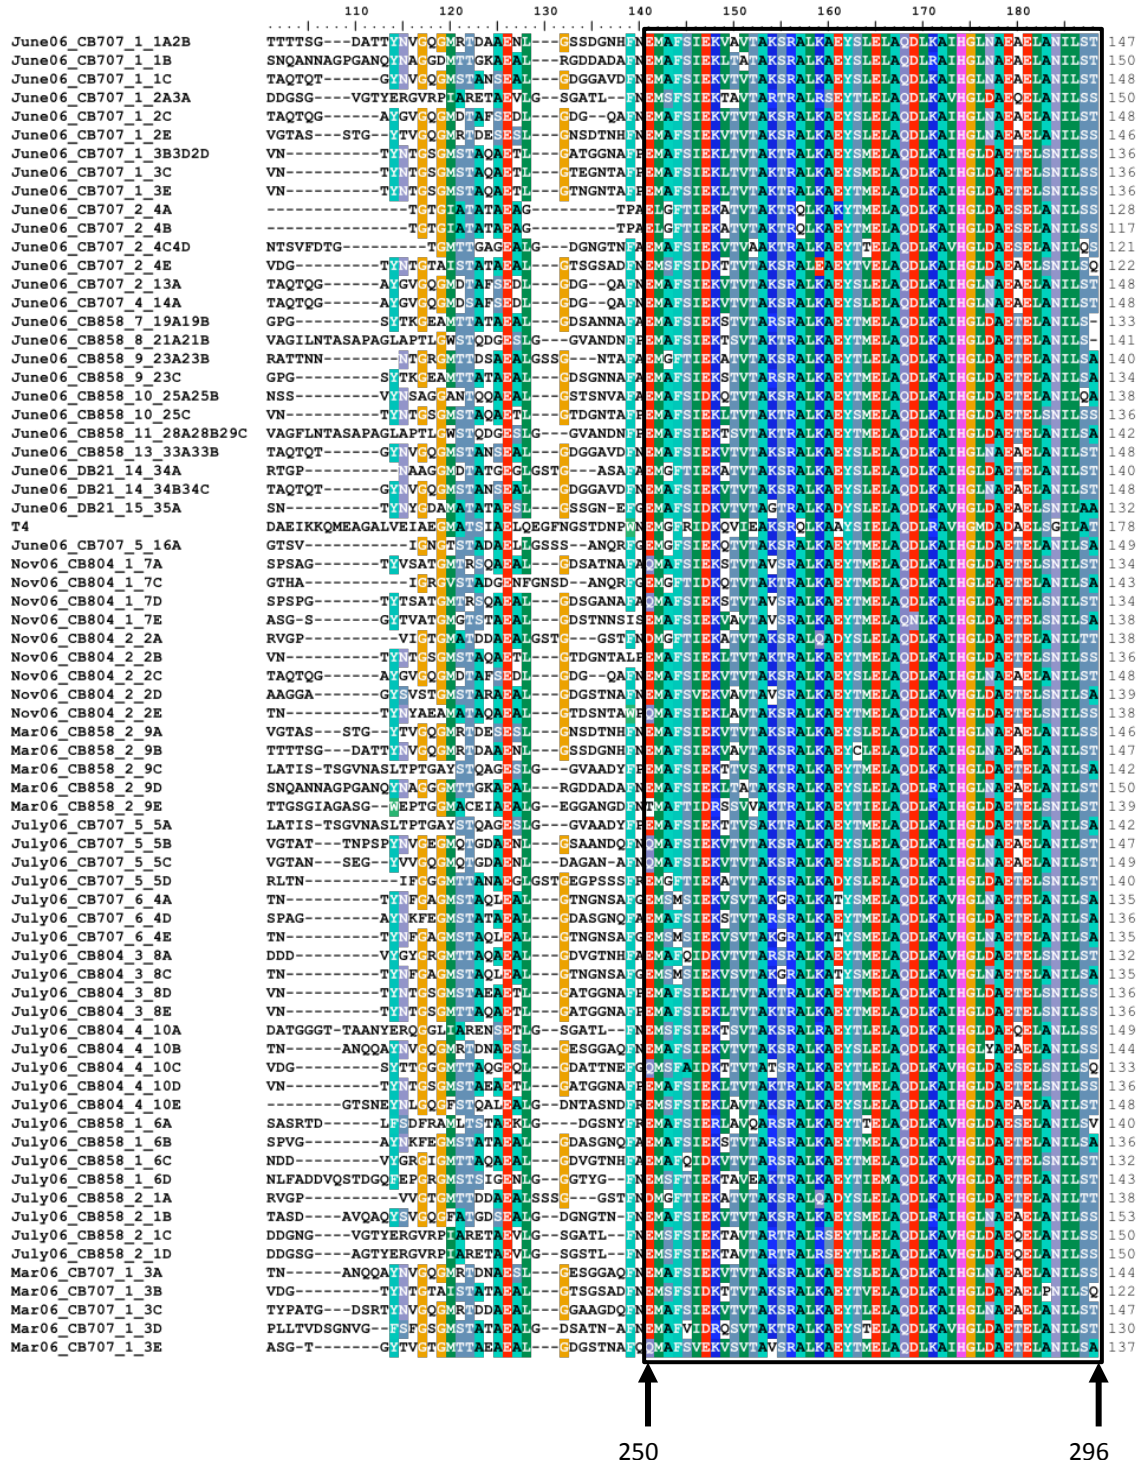

**Fig S1.** CLUSTALW alignment of Chesapeake and Delaware Bay gp23 amino acid sequences amplified with the primers MZIA1bis and MZIA6. The two highly conserved amino acid segments (119-131) in the upper half of the alignment and (250-296) in the lower half are boxed. The number of amino acid residues with respect to each of the sequences is indicated at the end of each sequence.
